# Supplementary material
Source: PubMed Central journal article supplement (PMC6424108)
Supplement: NIHMS1521193-supplement-1.pdf [file NIHMS1521193-supplement-1.pdf]

## Supplementary material

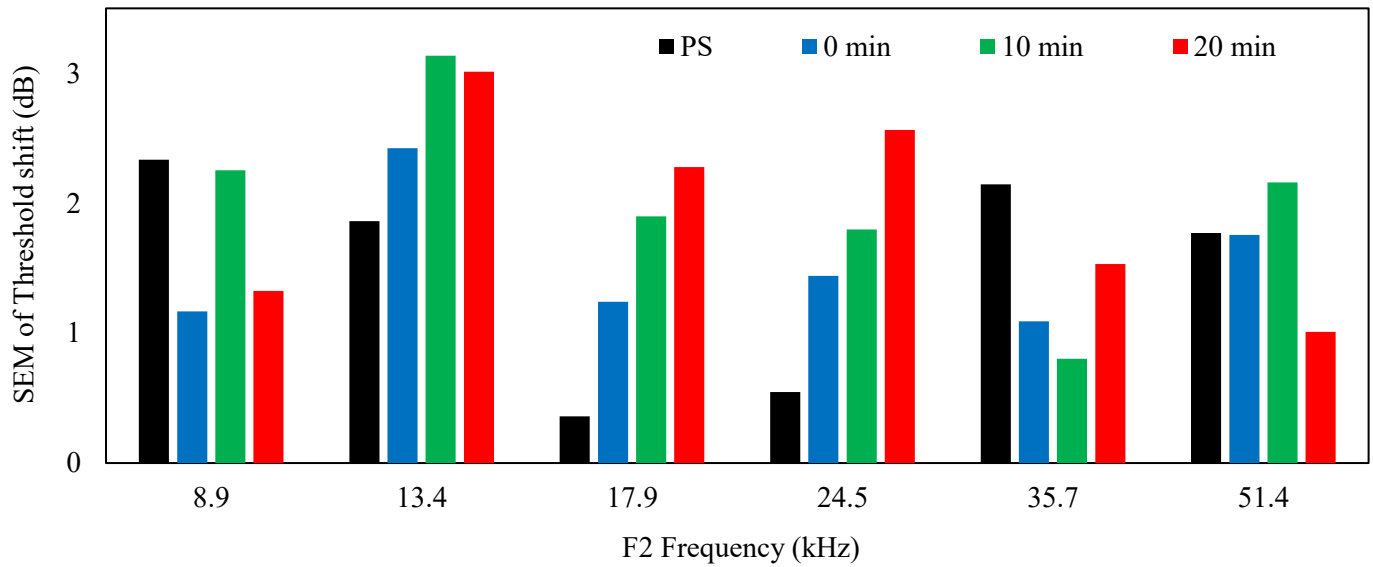

**Supplemental figure 1. Variance (SEM) for the F2 Frequency of the DPOAE data shown in Figure 6A. The various data collection time points are shown in color.**
